# Supplementary material for: Fisetin is a senotherapeutic that extends health and lifespan
Source: PubMed Central journal article supplement — eBioMedicine. 2018 Sep 29;36:18–28. doi: 10.1016/j.ebiom.2018.09.015 (PMC6197652; doi:10.1016/j.ebiom.2018.09.015), 2018-09-29
Supplement: mmc1.pdf [file mmc1.pdf]

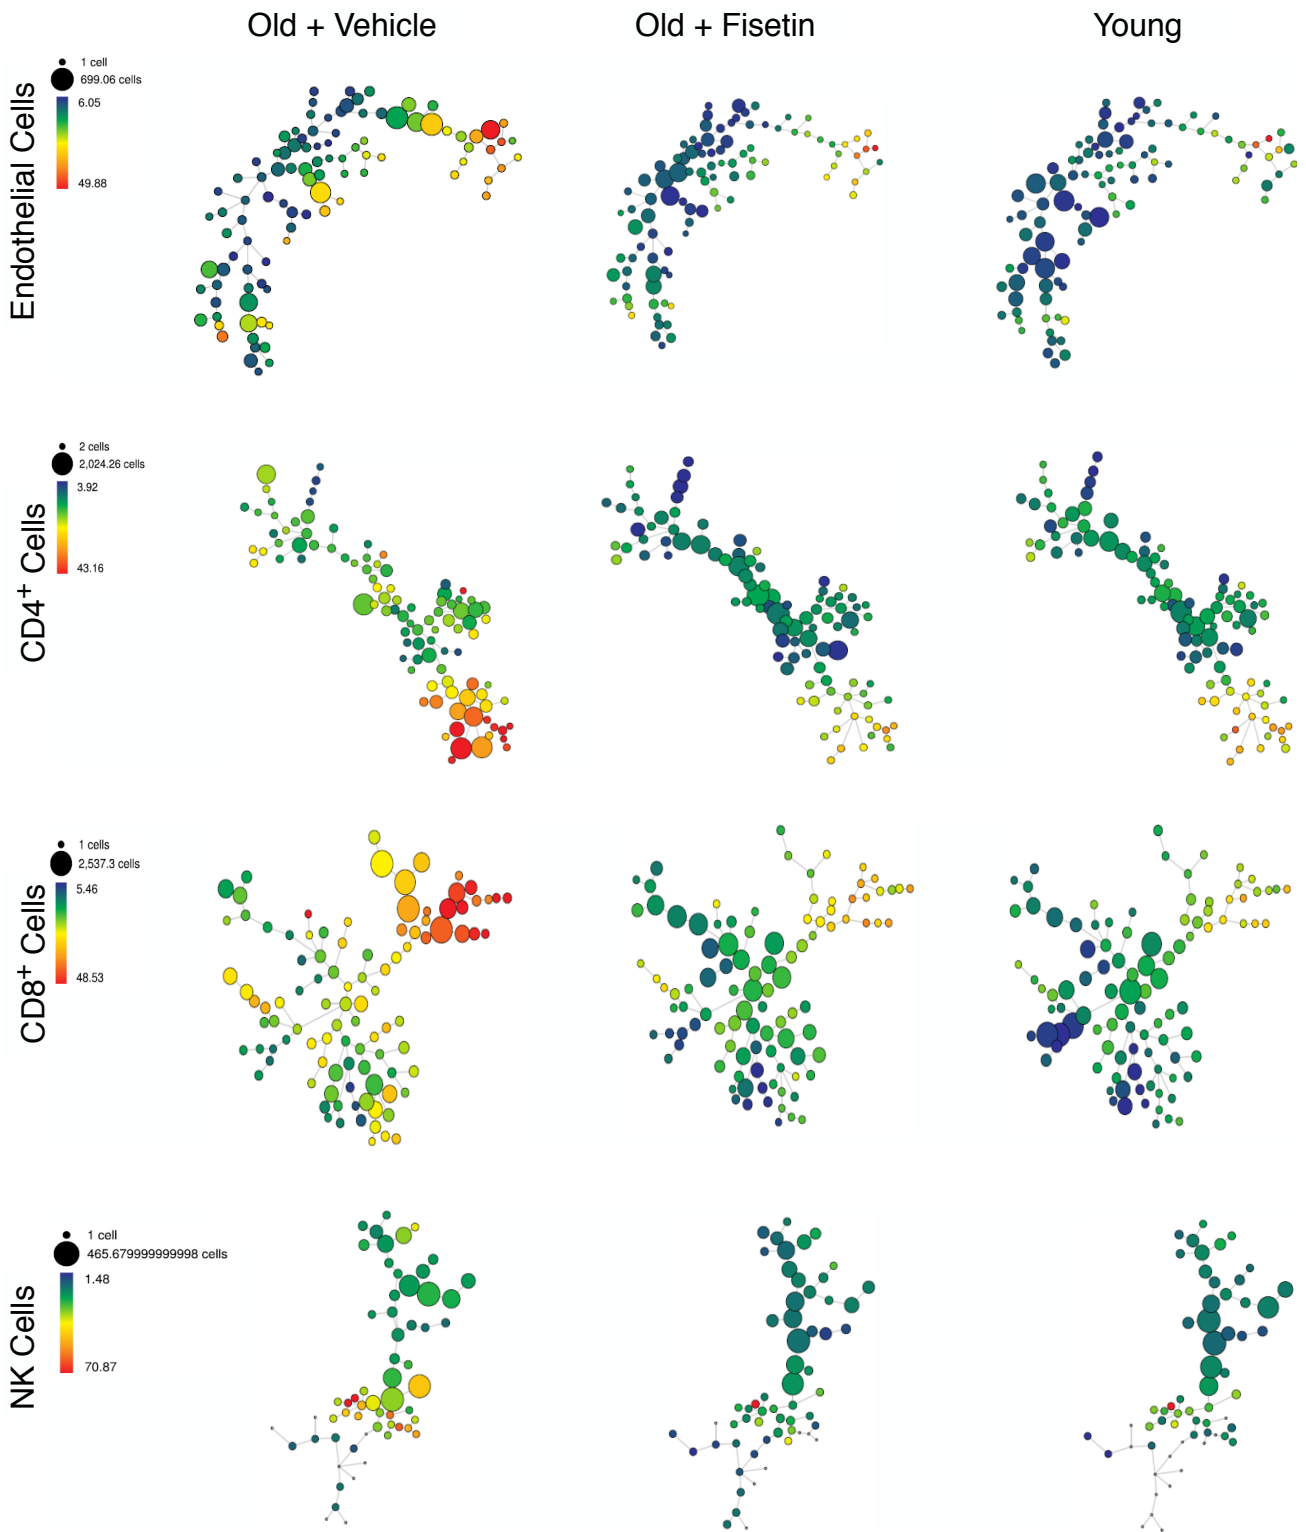

Supplemental Figure 1

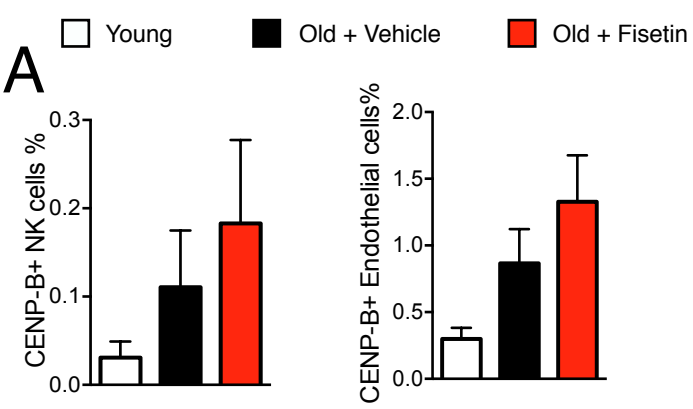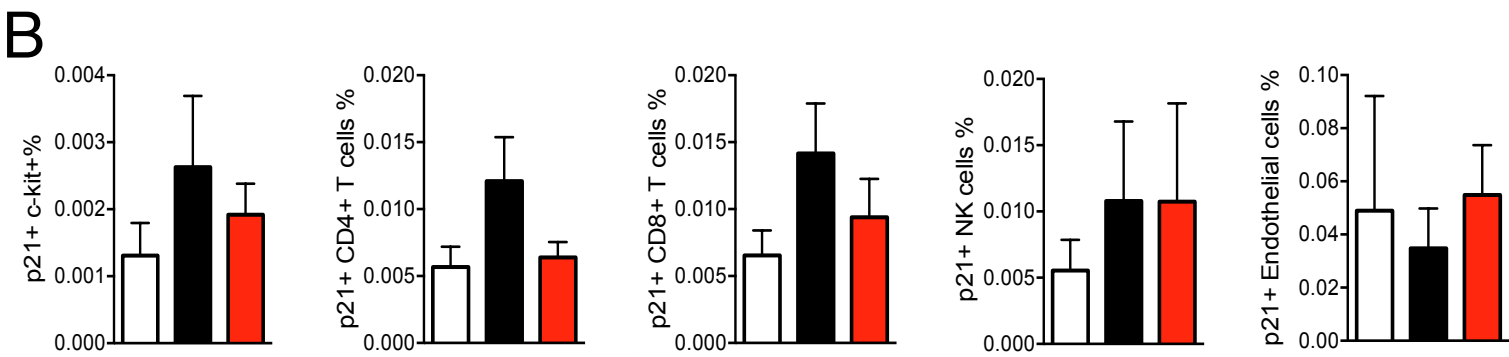

Supplemental Figure 2

□ Young    ■ Old + Vehicle    ■ Old + Fisetin

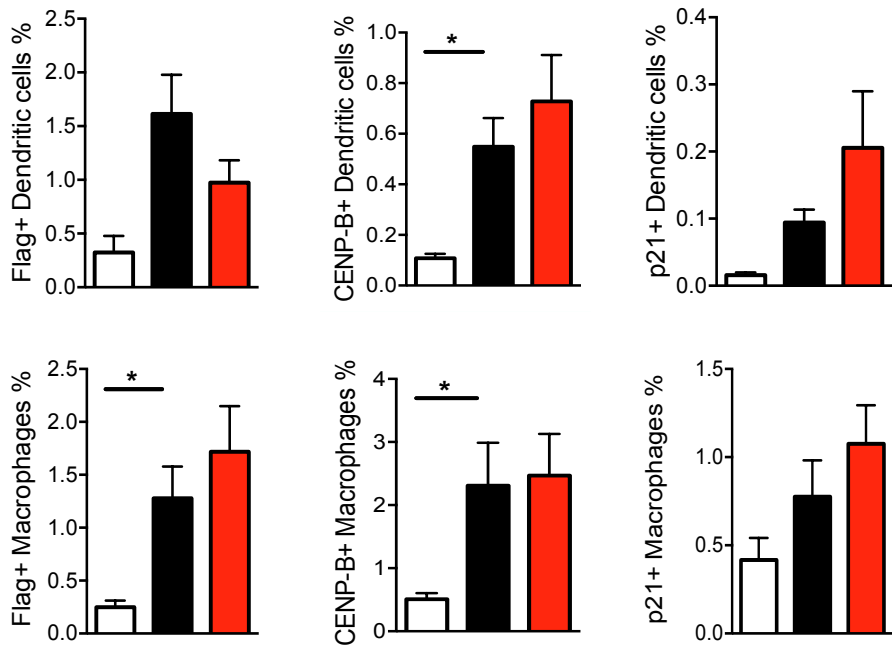

Supplemental Figure 3

| Targets         | Clone             | Vendor      | Cat#       | Metal Isotopes | Dilution |
|-----------------|-------------------|-------------|------------|----------------|----------|
| p21             | F-5               | Santa Cruz  | sc-6246    | 144Nd          | 1/50     |
| DYKDDDDK FLAG   | L5                | Bilegend    | 651501     | 170Er          | 1/50     |
| CENP-B          | Rabbit polyclonal | Abcam       | ab25734    | 145Nd          | 1/100    |
| F4/80           | BM8               | Fuidigm     | 3146008B   | 146Nd          | 1/200    |
| CD11b (Mac-1)   | M1/70             | Fuidigm     | 3154006B   | 154Sm          | 1/200    |
| CD11c           | N418              | Fuidigm     | 3209005B   | 209Bi          | 1/200    |
| Ki-67           | SolA15            | ebioscience | 14-5698-82 | 162Dy          | 1/400    |
| CD45            | 30-F11            | Fuidigm     | 3089005B   | 89Y            | 1/400    |
| Ly-6A/E (Sca-1) | D7                | Fuidigm     | 3164005B   | 164Dy          | 1/400    |
| CD31 (PECAM-1)  | 390               | Fuidigm     | 3165013B   | 165Ho          | 1/200    |
| CD146           | ME-9F1            | Fuidigm     | 3141016B   | 141Pr          | 1/200    |
| CD117 (ckit)    | 2B8               | Fuidigm     | 3166004B   | 166Er          | 1/50     |
| CD4             | RM4-5             | Fuidigm     | 3172003B   | 172Yb          | 1/200    |
| CD8a            | 53-6.7            | Fuidigm     | 3153012B   | 153Eu          | 1/201    |
| CD3e            | 145-2C11          | Fuidigm     | 3165020B   | 152Sm          | 1/202    |
| CD29            | eBioHMb1-1        | ebioscience | 14-0291-82 | 161Dy          | 1/400    |
| CD34            | RAM34             | ebioscience | 14-0341-82 | 147Sm          | 1/200    |
| CD161 (NK1.1)   | PK136             | Bilegend    | 108743     | 169Tm          | 1/100    |

## Supplemental Table 1
